# Supplementary material for: Identifying and measuring the behavioural, dietary, and physical activity components of weight management consultations delivered by general practice nurses in routine care
Source: Springer Nature journal article supplement (doi:10.1186/s12875-021-01403-1), 2021-04-07
Supplement: MOESM2 [file 19043452]

Additional file 2. Dietary recommendations and their definitions used by coders. This has been adapted after taking directly from Stok et Al's paper.

| Reference | Name                                              | Definition                                                                                                                                                                                                                                                                                                     |
|-----------|---------------------------------------------------|----------------------------------------------------------------------------------------------------------------------------------------------------------------------------------------------------------------------------------------------------------------------------------------------------------------|
| 1.1       | Preferences                                       | The extent to which food items are considered desirable or undesirable including underlying preferences (attitudes toward, e.g., taste, odor, color, or quality and health-related concerns) and expressed preferences (actual choice of one food item over another) (Rozin, 2006; Bernheim and Rangel, 2009). |
| 1.2       | Ability to pay                                    | The extent to which one is able to buy certain food products                                                                                                                                                                                                                                                   |
| 1.3       | Share of income spent on food                     | The share of income (of one person, family, or household) that is spent on the totality of food one consumes (Clements and Si, 2017).                                                                                                                                                                          |
| 1.4       | Willingness-to-pay                                | Largest sum of money one is willing to pay for a certain food product (Varian, 1992).                                                                                                                                                                                                                          |
| 1.5       | Frequency of purchase                             | How often a certain food product is purchased in a specific time frame (Kim and Rossi, 1994).                                                                                                                                                                                                                  |
| 1.6       | Product of purchase                               | Which food product is purchased (Mohd Suki, 2016). Influenced by looking at food labels                                                                                                                                                                                                                        |
| 1.7       | Food preparation                                  | Factors associated with how food is prepared for consumption (Larson et al., 2006).                                                                                                                                                                                                                            |
| 2.1       | Intentions                                        | What one intends or plans to choose, buy, or consume (Conner et al., 2002).                                                                                                                                                                                                                                    |
| 2.2       | Eating habits                                     | Umbrella term for outcomes related to the actual act of consumption.                                                                                                                                                                                                                                           |
| 2.3       | Eating occasions                                  | The typical/habitual eating behaviors that one has developed over time, often triggered automatically in response to contextual cues that have been associated with their performance (Gardner, 2015).                                                                                                         |
| 2.4       | Frequency                                         | How often one eats (Gomez et al., 2015).                                                                                                                                                                                                                                                                       |
| 2.5       | Time                                              | When one eats (which moment of the day) (Kupek et al., 2016).                                                                                                                                                                                                                                                  |
| 2.6       | Rate of eating                                    | The speed at which one eats a certain amount of food.                                                                                                                                                                                                                                                          |
| 2.7.1     | Portions size                                     | A specification of the amount one eats in terms of the size of a standard portion (Nielsen and Popkin, 2003).                                                                                                                                                                                                  |
| 2.7.2     | Portion number                                    | A specification of the amount one eats in terms of the amount of standard portions (Benton, 2015).                                                                                                                                                                                                             |
| 2.8       | Food and drink substitution                       | The exchange of one food or drink item for another (commonly the substitution of an unhealthy food for a healthier one)                                                                                                                                                                                        |
| 2.9       | Disordered eating symptoms                        | Signals of abnormal eating (e.g., anorexia and binge eating) (Rohde et al., 2015).                                                                                                                                                                                                                             |
| 2.10      | Neophobia/pickiness/fussiness                     | Different aspects of selective eating (Dovey et al., 2008).                                                                                                                                                                                                                                                    |
| 3.1.1     | Type of pattern                                   | Characterization of the dietary pattern, e.g., in Western, Mediterranean, and Prudent (Hu, 2002).                                                                                                                                                                                                              |
| 3.1.2     | Diversity of pattern                              | Diversity of foods and beverages consumed (within a specific pattern) (Hu, 2002).                                                                                                                                                                                                                              |
| 3.1.3.1   | Healthiness-unhealthy intake                      | Consumption of (combinations) of foods and beverages attributed to have a negative effect on one's health, e.g., sugar sweetened beverages (Ocké, 2013).                                                                                                                                                       |
| 3.1.3.2   | Healthiness- healthy intake                       | Consumption of (combinations) of foods and beverages attributed to have a positive effect on one's health, e.g., fruits and vegetables (Ocké, 2013).                                                                                                                                                           |
| 3.2.1     | Meal content                                      | Combination of food items within a meal (Leech et al., 2015b).                                                                                                                                                                                                                                                 |
| 3.2.2     | Caloric and nutrient intake distribution          | Distribution of (daily) energy and nutrient intake across the main meals and snacks (Leech et al., 2015b).                                                                                                                                                                                                     |
| 3.3       | Total energy intake                               | Total amount of energy consumed within a specific time frame (mostly per day)                                                                                                                                                                                                                                  |
| 3.4       | 3.4 Food and non-alcoholic drink intake           | Amount/servings of food items one eats within a specific time frame (mostly per day) (Illner et al., 2010).                                                                                                                                                                                                    |
| 3.5.1     | Food and non-alcoholic drink components-nutrients | The nutrients (carbohydrates, protein, fat, vitamins, minerals, and water) in a food item (Coultrate, 2009).                                                                                                                                                                                                   |

|       |                                                 |                                                                 |
|-------|-------------------------------------------------|-----------------------------------------------------------------|
| 3.5.2 | Food and non-alcoholic drink components- energy | The caloric content of a food item (Coultrate, 2009).           |
| 3.5.3 | Food and non-alcoholic drink components- other  | Non-nutritive food components of a food item (Coultrate, 2009). |
| 3.6   | Alcoholic drink intake                          | The consumption of alcoholic beverages.                         |
