# Supplementary material for: Identifying and measuring the behavioural, dietary, and physical activity components of weight management consultations delivered by general practice nurses in routine care
Source: Springer Nature journal article supplement (doi:10.1186/s12875-021-01403-1), 2021-04-07
Supplement: MOESM4 [file 19043452]

Additional file 4. Physical activity recommendations and their definitions used by coders.

| Reference | Name                                 | Definition                                                                                      |
|-----------|--------------------------------------|-------------------------------------------------------------------------------------------------|
| 1         | Sedentary time                       | Being sedentary.                                                                                |
| 2.1       | Lifestyle activity type walking      | Walking as a form of physical activity.                                                         |
| 2.2       | Lifestyle activity type other        | A lifestyle activity that is not walking as a form of physical activity.                        |
| 2.3       | Frequency                            | Frequency of a lifestyle activity, walking or other.                                            |
| 2.4       | Intensity                            | Intensity of a lifestyle activity, walking or other.                                            |
| 2.5       | Duration                             | Duration of a lifestyle activity, walking or other.                                             |
| 3.1       | Structured activity type e.g. sports | A structured activity that is not a lifestyle activity, frequently a sport or going to the gym. |
| 3.2       | Frequency                            | Frequency of a structured activity.                                                             |
| 3.3       | Intensity                            | Intensity of a structured activity.                                                             |
| 3.4       | Duration                             | Duration of a structured activity.                                                              |
