# Supplementary material for: Identifying and measuring the behavioural, dietary, and physical activity components of weight management consultations delivered by general practice nurses in routine care
Source: Springer Nature journal article supplement (doi:10.1186/s12875-021-01403-1), 2021-04-07
Supplement: MOESM5 [file 19043452]

**Table S1. Correlation coefficients (p-value) between the average number of BCTs or recommendations used per consultation per participant and percentage weight change at 3, 6 and 12 months.**

|                                          | Average number of BCTs per consultation per participant | Average number of dietary recommendations per consultation per participant | Average number of physical activity recommendations per consultation per participant |
|------------------------------------------|---------------------------------------------------------|----------------------------------------------------------------------------|--------------------------------------------------------------------------------------|
| 3-month percentage weight change (n=40)  | -0.01 (0.94)                                            | 0.00 (1.00)                                                                | 0.29 (0.07)                                                                          |
| 6-month percentage weight change (n=39)  | -0.02 (0.89)                                            | -0.21 (0.21)                                                               | 0.24 (0.15)                                                                          |
| 12-month percentage weight change (n=40) | 0.23 (0.16)                                             | 0.04 (0.83)                                                                | 0.36 (0.02)                                                                          |

N= number of participants

**Table S2. Comparisons of the number of BCTs, dietary and physical activity recommendations per consultations of participants that lost < and lost ≥5% of their baseline body weight at 6 months (mean ± standard deviation) with p-values of independent T-tests.**

|                                                                                    | Participants with <5% weight loss at 6 months n=20 | Participants with ≥ 5% weight loss at 6 months n=19 | Independent T-test p-value |
|------------------------------------------------------------------------------------|----------------------------------------------------|-----------------------------------------------------|----------------------------|
| Mean number of BCTs coded as present per consultation                              | 3.5 (SD 1.2)                                       | 3.8 (SD 1.3)                                        | 0.52                       |
| Mean number of dietary recommendations coded as present per consultation           | 3.2 (SD 2.5)                                       | 3.1 (SD 2.3)                                        | 0.56                       |
| Mean number of physical activity recommendations coded as present per consultation | 1.4 (SD 1.2)                                       | 0.9 (SD 0.9)                                        | 0.26                       |

**Table S3. Comparison of BCT, dietary recommendations and physical activity recommendations used in consultations among participants that lost < and lost ≥5% baseline weight at 6 months with Chi-squared p-values and Fisher's exact test where appropriate.**

| BCT or recommendation               | % used in consultations                                      |                                                              | Chi squared p-value, *Fisher's exact test |
|-------------------------------------|--------------------------------------------------------------|--------------------------------------------------------------|-------------------------------------------|
|                                     | Of the 20 participants with <5% weight loss at 6 months n=62 | Of the 19 participants with ≥5% weight loss at 6 months n=59 |                                           |
| <b>BCT</b>                          |                                                              |                                                              |                                           |
| Feedback on outcome(s) of behaviour | 77.4                                                         | 79.7                                                         | 0.76                                      |

|                                                               |      |      |       |
|---------------------------------------------------------------|------|------|-------|
| Problem solving                                               | 43.6 | 37.3 | 0.48  |
| Social reward                                                 | 29.0 | 52.5 | 0.01  |
| Instruction on how to perform a behaviour                     | 29.0 | 20.3 | 0.27  |
| Self-monitoring of behaviour                                  | 24.2 | 27.1 | 0.71  |
| Biofeedback                                                   | 21.0 | 23.7 | 0.72  |
| Framing/ reframing                                            | 25.8 | 33.9 | 0.33  |
| Information about health consequences                         | 19.4 | 15.3 | 0.55  |
| Social comparison                                             | 16.1 | 10.2 | 0.33  |
| Self-monitoring of outcome(s) of behaviour                    | 8.1  | 8.5  | 0.93  |
| Credible source                                               | 4.8  | 13.6 | *0.12 |
| Feedback on behaviour                                         | 4.8  | 10.2 | *0.32 |
| Behaviour substitution                                        | 11.3 | 3.4  | *0.16 |
| Restructuring the physical environment                        | 9.7  | 3.4  | *0.27 |
| Graded tasks                                                  | 3.2  | 8.5  | *0.26 |
| Goal setting (behaviour)                                      | 3.2  | 5.1  | *0.67 |
| Monitoring outcome(s) of behaviour by others without feedback | 6.5  | 1.7  | *0.37 |
| Monitoring of emotional consequences                          | 0.0  | 6.8  | *0.11 |
| Goal setting (outcome)                                        | 4.8  | 1.7  | *0.62 |
| Non-specific incentive                                        | 3.2  | 1.7  | *1.00 |
| Review behaviour goal(s)                                      | 0.0  | 3.4  | *0.24 |
| Social support (unspecified)                                  | 1.6  | 1.7  | *1.00 |
| Reduce negative emotions                                      | 0.0  | 1.7  | *0.49 |
| Body changes                                                  | 0.0  | 1.7  | *0.49 |
| Social support (practical)                                    | 0.0  | 1.7  | *0.49 |
| Pharmacological support                                       | 1.6  | 0.0  | *1.00 |
| Distraction                                                   | 1.6  | 0.0  | *1.00 |
| Adding objects to the environment                             | 1.6  | 0.0  | *1.00 |
| <b><i>Dietary recommendations</i></b>                         |      |      |       |
| Portions size                                                 | 40.3 | 33.9 | 0.47  |
| Food and non-alcoholic drink components- nutrients            | 30.7 | 28.8 | 0.83  |
| Diversity of pattern                                          | 27.4 | 25.4 | 0.80  |
| Food and non-alcoholic drink components- energy               | 19.4 | 22.0 | 0.72  |
| Total energy intake                                           | 14.5 | 15.3 | 0.91  |
| Portion number                                                | 21.0 | 13.6 | 0.28  |
| Food and drink substitution                                   | 16.1 | 15.3 | 0.90  |

|                                                 |      |      |       |
|-------------------------------------------------|------|------|-------|
| Food preparation                                | 14.5 | 18.6 | 0.54  |
| Caloric and nutrient intake distribution        | 19.4 | 13.6 | 0.39  |
| Frequency                                       | 17.7 | 13.6 | 0.53  |
| Food and non-alcoholic drink intake             | 16.1 | 15.3 | 0.71  |
| Type of pattern                                 | 16.1 | 13.6 | 0.69  |
| Alcoholic drink intake                          | 11.3 | 13.6 | 0.90  |
| Product of purchase                             | 12.9 | 10.2 | 0.64  |
| Eating occasions                                | 8.1  | 10.2 | 0.69  |
| Meal content                                    | 6.5  | 8.5  | *0.74 |
| Healthiness- healthy intake                     | 8.1  | 1.7  | *0.21 |
| Time                                            | 6.5  | 1.7  | *0.37 |
| Food and non-alcoholic drink components- other  | 1.6  | 5.1  | *0.36 |
| Intentions                                      | 3.2  | 3.4  | *1.00 |
| Eating habits                                   | 3.2  | 3.4  | *1.00 |
| Rate of eating                                  | 1.6  | 1.7  | *1.00 |
| Willingness to pay                              | 0.0  | 1.7  | *0.49 |
| Ability to pay                                  | 0.0  | 1.7  | *0.49 |
| Preferences                                     | 0.0  | 1.7  | *0.49 |
| <b><i>Physical activity recommendations</i></b> |      |      |       |
| Lifestyle activity type walking                 | 32.3 | 32.2 | 1.00  |
| Structured activity type e.g. sports            | 27.4 | 23.7 | 0.64  |
| Intensity (of lifestyle activity)               | 22.6 | 13.6 | 0.20  |
| Lifestyle activity type other                   | 17.7 | 8.5  | 0.13  |
| Duration (of lifestyle activity)                | 11.2 | 6.8  | *0.53 |
| Frequency (of structured activity)              | 11.2 | 1.7  | *0.06 |
| Intensity (of structured activity)              | 11.2 | 1.7  | *0.06 |
| Duration (of structured activity)               | 9.7  | 5.1  | *0.49 |
| Frequency (of lifestyle activity)               | 8.1  | 1.7  | *0.21 |

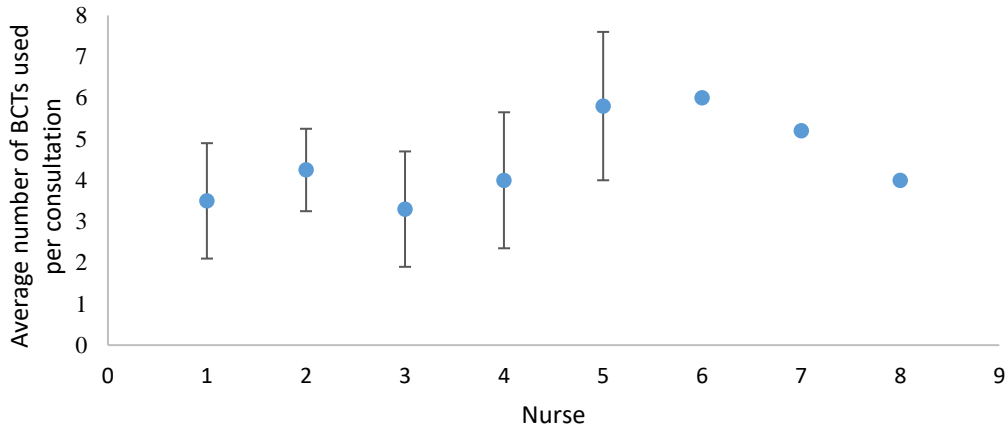

**Figure S1. BCT usage (mean  $\pm$  standard deviations) for individual nurses.**

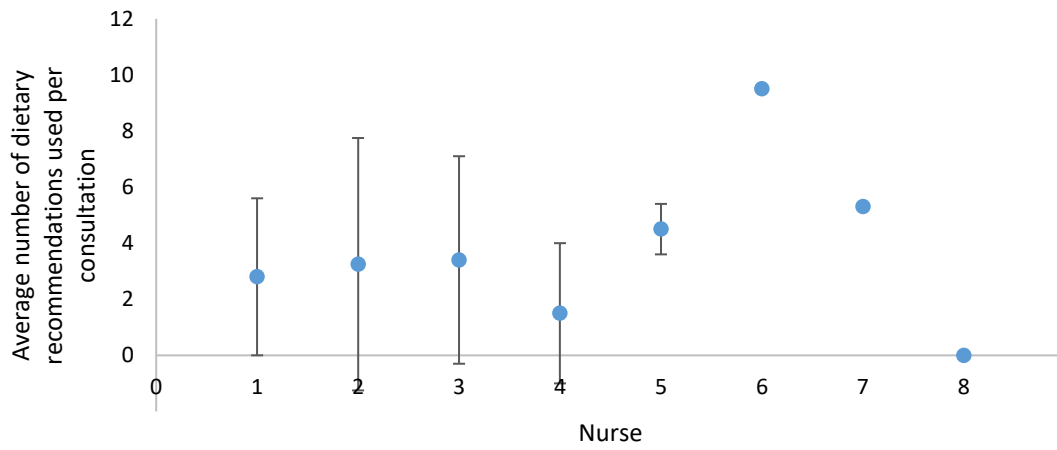

**Figure S2. Dietary recommendation usage (mean  $\pm$  standard deviations) for individual nurses.**

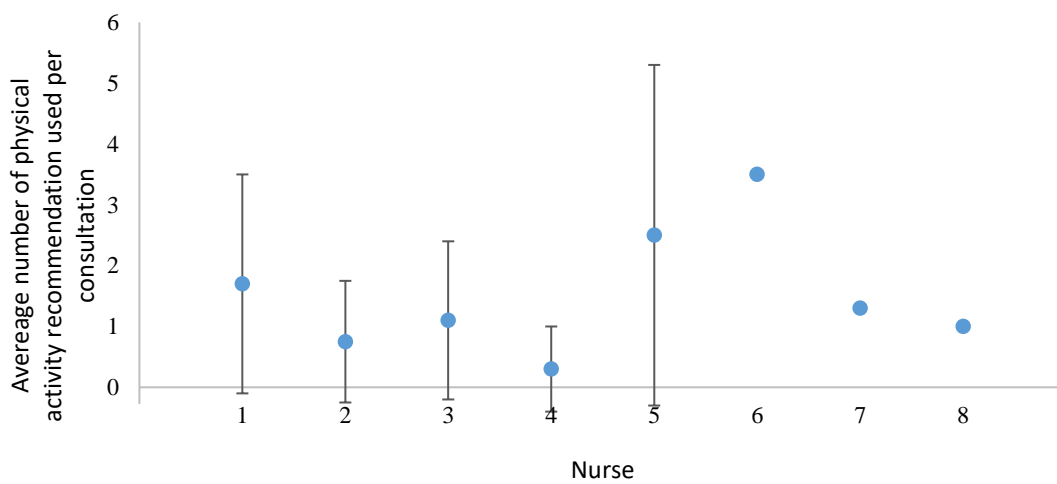

**Figure S3. PA recommendation usage (mean  $\pm$  standard deviations) for individual nurses.**

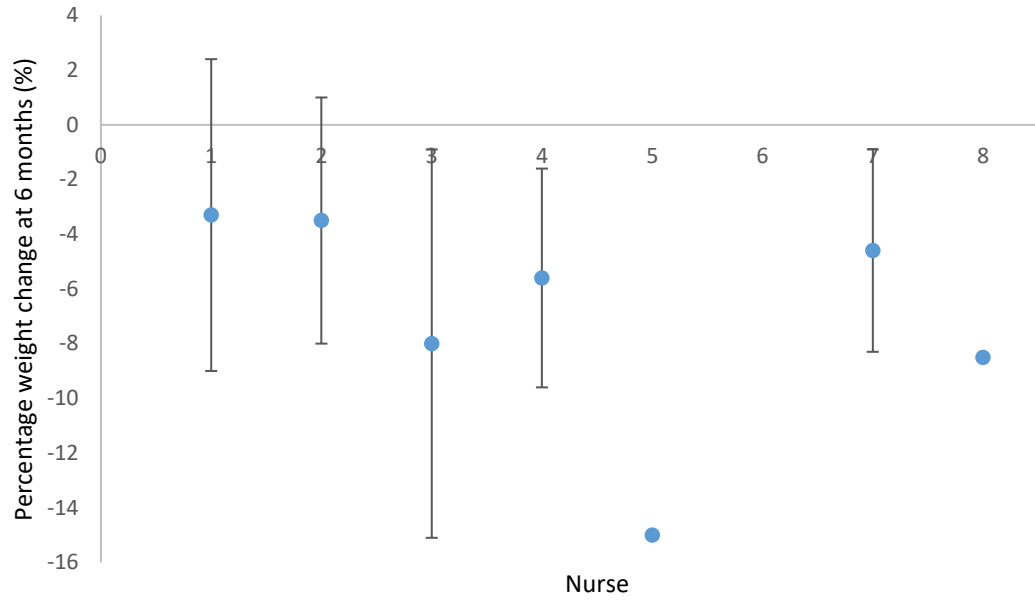

**Figure S4. Percentage weight change (mean  $\pm$  standard deviation) of individual nurses' groups of participants.**
